# Supplementary material for: Air-water CO 2 evasion from U.S. East Coast estuaries
Source: Copernicus journal article supplement (doi:10.5194/bg-2016-278), 2016-07-18
Supplement: Supplementary file 1 [file bg-2016-278-supplement.pdf]

**Table S1:** Seasonal surface area (*S*), fresh water discharge (*Q*), residence time (*Rt*), *FCO<sub>2</sub>* and *NEM* of all simulated estuaries. W, Sp, Su, F correspond to winter, spring, summer and fall, respectively.

| long<br>degrees | lat<br>degree | Season<br>- | <i>T</i><br>°C | <i>Q</i><br><i>m</i> <sup>3</sup> <i>s</i> <sup>-1</sup> | $\overline{FCO_2}$<br><i>mol C m</i> <sup>-2</sup> <i>yr</i> <sup>-1</sup> | $\overline{NEM}$<br><i>mol C m</i> <sup>-2</sup> <i>yr</i> <sup>-1</sup> | <i>FCO<sub>2</sub></i><br><i>10</i> <sup>6</sup> <i>mol C yr</i> <sup>-1</sup> | <i>NEM</i><br><i>10</i> <sup>6</sup> <i>mol C yr</i> <sup>-1</sup> |
|-----------------|---------------|-------------|----------------|----------------------------------------------------------|----------------------------------------------------------------------------|--------------------------------------------------------------------------|--------------------------------------------------------------------------------|--------------------------------------------------------------------|
| <b>NAR</b>      |               |             |                |                                                          |                                                                            |                                                                          |                                                                                |                                                                    |
| -67,25          | 44,75         | 29,4        | 3,52           | W                                                        | 5,2                                                                        | -19,7                                                                    | 9                                                                              | -34                                                                |
| -67,25          | 44,75         | 97,4        | 5,6            | Sp                                                       | 2,6                                                                        | -31,5                                                                    | 5                                                                              | -55                                                                |
| -67,25          | 44,75         | 26,2        | 11             | Su                                                       | 2,7                                                                        | -56,0                                                                    | 5                                                                              | -98                                                                |
| -67,25          | 44,75         | 46,6        | 9              | F                                                        | 4,3                                                                        | -42,3                                                                    | 8                                                                              | -74                                                                |
| -67,25          | 45,25         | 56,2        | 3,52           | W                                                        | 6,8                                                                        | -31,9                                                                    | 19                                                                             | -88                                                                |
| -67,25          | 45,25         | 186,2       | 5,6            | Sp                                                       | 4,1                                                                        | -51,9                                                                    | 11                                                                             | -144                                                               |
| -67,25          | 45,25         | 50,1        | 11             | Su                                                       | 5,9                                                                        | -77,7                                                                    | 16                                                                             | -215                                                               |
| -67,25          | 45,25         | 89,1        | 9              | F                                                        | 7,3                                                                        | -65,2                                                                    | 20                                                                             | -181                                                               |
| -67,25          | 45,25         | 56,2        | 3,52           | W                                                        | 14,4                                                                       | -31,9                                                                    | 40                                                                             | -88                                                                |
| -67,25          | 45,25         | 186,2       | 5,6            | Sp                                                       | 11,2                                                                       | -51,8                                                                    | 31                                                                             | -144                                                               |
| -67,25          | 45,25         | 50,1        | 11             | Su                                                       | 11,3                                                                       | -77,7                                                                    | 31                                                                             | -215                                                               |
| -67,25          | 45,25         | 89,1        | 9              | F                                                        | 18,1                                                                       | -65,1                                                                    | 50                                                                             | -181                                                               |
| -67,75          | 44,75         | 55,8        | 3,52           | W                                                        | 7,9                                                                        | -33,7                                                                    | 7                                                                              | -29                                                                |
| -67,75          | 44,75         | 184,9       | 5,6            | Sp                                                       | 10,0                                                                       | -41,8                                                                    | 9                                                                              | -36                                                                |
| -67,75          | 44,75         | 49,8        | 11             | Su                                                       | 2,7                                                                        | -103,4                                                                   | 2                                                                              | -89                                                                |
| -67,75          | 44,75         | 88,5        | 9              | F                                                        | 6,0                                                                        | -75,1                                                                    | 5                                                                              | -65                                                                |
| -68,25          | 44,75         | 53          | 3,52           | W                                                        | 5,3                                                                        | -30,0                                                                    | 18                                                                             | -100                                                               |
| -68,25          | 44,75         | 175,8       | 5,6            | Sp                                                       | 2,6                                                                        | -43,1                                                                    | 9                                                                              | -144                                                               |
| -68,25          | 44,75         | 47,3        | 11             | Su                                                       | 3,9                                                                        | -87,9                                                                    | 13                                                                             | -294                                                               |
| -68,25          | 44,75         | 84,1        | 9              | F                                                        | 4,7                                                                        | -63,9                                                                    | 16                                                                             | -214                                                               |
| -68,75          | 44,75         | 236,2       | 3,52           | W                                                        | 20,3                                                                       | -31,5                                                                    | 418                                                                            | -648                                                               |
| -68,75          | 44,75         | 783,5       | 5,6            | Sp                                                       | 16,4                                                                       | -51,4                                                                    | 337                                                                            | -1057                                                              |
| -68,75          | 44,75         | 210,9       | 11             | Su                                                       | 39,5                                                                       | -83,3                                                                    | 813                                                                            | -1712                                                              |
| -68,75          | 44,75         | 374,8       | 9              | F                                                        | 33,3                                                                       | -66,5                                                                    | 685                                                                            | -1367                                                              |
| -69,75          | 44,25         | 473,5       | 3,52           | W                                                        | 28,2                                                                       | -44,0                                                                    | 323                                                                            | -505                                                               |
| -69,75          | 44,25         | 1570,3      | 5,6            | Sp                                                       | 17,6                                                                       | -61,1                                                                    | 202                                                                            | -701                                                               |
| -69,75          | 44,25         | 422,8       | 11             | Su                                                       | 40,0                                                                       | -107,3                                                                   | 459                                                                            | -1230                                                              |
| -69,75          | 44,25         | 751,1       | 9              | F                                                        | 43,3                                                                       | -85,3                                                                    | 497                                                                            | -978                                                               |
| -70,25          | 43,75         | 19,7        | 0              | W                                                        | 3,4                                                                        | -19,4                                                                    | 3                                                                              | -16                                                                |
| -70,25          | 43,75         | 65,3        | 0              | Sp                                                       | 1,8                                                                        | -22,5                                                                    | 1                                                                              | -18                                                                |
| -70,25          | 43,75         | 17,6        | 0              | Su                                                       | 1,0                                                                        | -21,2                                                                    | 1                                                                              | -17                                                                |
| -70,25          | 43,75         | 31,3        | 0              | F                                                        | 2,5                                                                        | -21,1                                                                    | 2                                                                              | -17                                                                |
| -70,75          | 41,75         | 34,1        | 5              | W                                                        | 4,7                                                                        | -2,8                                                                     | 315                                                                            | -184                                                               |
| -70,75          | 41,75         | 70,5        | 8              | Sp                                                       | 4,4                                                                        | -3,8                                                                     | 295                                                                            | -253                                                               |
| -70,75          | 41,75         | 16,2        | 16             | Su                                                       | 5,0                                                                        | -5,2                                                                     | 336                                                                            | -350                                                               |
| -70,75          | 41,75         | 35,2        | 10             | F                                                        | 5,7                                                                        | -4,1                                                                     | 379                                                                            | -276                                                               |
| -70,75          | 42,25         | 162,8       | 5              | W                                                        | 12,5                                                                       | -20,1                                                                    | 190                                                                            | -305                                                               |
| -70,75          | 42,25         | 226,8       | 9              | Sp                                                       | 9,9                                                                        | -29,0                                                                    | 150                                                                            | -439                                                               |
| -70,75          | 42,25         | 51,3        | 18             | Su                                                       | 25,5                                                                       | -48,6                                                                    | 387                                                                            | -737                                                               |
| -70,75          | 42,25         | 116,5       | 10             | F                                                        | 16,9                                                                       | -34,0                                                                    | 256                                                                            | -515                                                               |
| <b>MAR</b>      |               |             |                |                                                          |                                                                            |                                                                          |                                                                                |                                                                    |
| -70,75          | 43,25         | 165,9       | 4              | W                                                        | 16,5                                                                       | -20,8                                                                    | 119                                                                            | -151                                                               |
| -70,75          | 43,25         | 231,2       | 7              | Sp                                                       | 15,6                                                                       | -29,3                                                                    | 112                                                                            | -212                                                               |
| -70,75          | 43,25         | 52,3        | 14             | Su                                                       | 32,5                                                                       | -61,6                                                                    | 235                                                                            | -445                                                               |
| -70,75          | 43,25         | 118,7       | 9              | F                                                        | 21,9                                                                       | -37,8                                                                    | 158                                                                            | -273                                                               |
| -71,25          | 41,75         | 32          | 5              | W                                                        | 3,2                                                                        | -1,6                                                                     | 193                                                                            | -93                                                                |
| -71,25          | 41,75         | 66,3        | 8              | Sp                                                       | 3,9                                                                        | -2,5                                                                     | 237                                                                            | -151                                                               |
| -71,25          | 41,75         | 15,3        | 16             | Su                                                       | 4,0                                                                        | -3,4                                                                     | 241                                                                            | -202                                                               |
| -71,25          | 41,75         | 33,1        | 10             | F                                                        | 4,4                                                                        | -2,7                                                                     | 263                                                                            | -162                                                               |
| -71,75          | 41,25         | 127         | 5              | W                                                        | 53,8                                                                       | -17,2                                                                    | 261                                                                            | -84                                                                |
| -71,75          | 41,25         | 262,9       | 8              | Sp                                                       | 17,8                                                                       | -26,1                                                                    | 86                                                                             | -126                                                               |
| -71,75          | 41,25         | 60,5        | 16             | Su                                                       | 35,8                                                                       | -54,9                                                                    | 174                                                                            | -266                                                               |
| -71,75          | 41,25         | 131,2       | 10             | F                                                        | 33,5                                                                       | -32,2                                                                    | 162                                                                            | -156                                                               |
| -72,75          | 40,75         | 28,9        | 5              | W                                                        | 31,5                                                                       | -15,9                                                                    | 150                                                                            | -76                                                                |

|            |       |        |    |    |       |       |      |       |
|------------|-------|--------|----|----|-------|-------|------|-------|
| -72,75     | 40,75 | 59,9   | 10 | Sp | 11,5  | -28,6 | 55   | -136  |
| -72,75     | 40,75 | 13,8   | 21 | Su | 9,9   | -19,6 | 47   | -93   |
| -72,75     | 40,75 | 29,9   | 13 | F  | 69,8  | -20,4 | 333  | -97   |
| -72,75     | 41,25 | 157,7  | 5  | W  | 167,3 | -20,0 | 407  | -49   |
| -72,75     | 41,25 | 326,5  | 8  | Sp | 12,0  | -32,3 | 29   | -79   |
| -72,75     | 41,25 | 75,2   | 16 | Su | 28,8  | -58,9 | 70   | -143  |
| -72,75     | 41,25 | 163    | 10 | F  | 395,1 | -36,4 | 962  | -89   |
| -72,75     | 41,75 | 509,4  | 5  | W  | 52,3  | -25,2 | 679  | -327  |
| -72,75     | 41,75 | 1054,9 | 8  | Sp | 48,8  | -43,7 | 633  | -566  |
| -72,75     | 41,75 | 242,9  | 16 | Su | 68,1  | -68,6 | 884  | -890  |
| -72,75     | 41,75 | 526,5  | 10 | F  | 54,3  | -45,2 | 704  | -586  |
| -74,25     | 40,75 | 835,2  | 5  | W  | 14,2  | -10,1 | 3927 | -2800 |
| -74,25     | 40,75 | 1128,3 | 10 | Sp | 17,7  | -12,7 | 4905 | -3511 |
| -74,25     | 40,75 | 329,3  | 21 | Su | 14,1  | -12,4 | 3907 | -3426 |
| -74,25     | 40,75 | 680,8  | 13 | F  | 15,8  | -12,0 | 4384 | -3313 |
| -75,25     | 37,75 | 141,3  | 9  | W  | 18,0  | -5,4  | 1715 | -516  |
| -75,25     | 37,75 | 157,7  | 14 | Sp | 17,0  | -5,9  | 1615 | -557  |
| -75,25     | 37,75 | 40     | 24 | Su | 7,1   | -4,3  | 672  | -405  |
| -75,25     | 37,75 | 88,4   | 16 | F  | 13,6  | -4,7  | 1294 | -442  |
| -75,25     | 38,75 | 55,9   | 5  | W  | 8,9   | -2,7  | 729  | -224  |
| -75,25     | 38,75 | 62,4   | 13 | Sp | 8,4   | -2,9  | 685  | -240  |
| -75,25     | 38,75 | 15,8   | 23 | Su | 5,1   | -3,5  | 422  | -286  |
| -75,25     | 38,75 | 35     | 14 | F  | 7,6   | -3,0  | 628  | -247  |
| -75,25     | 39,75 | 664,7  | 5  | W  | 9,3   | -6,7  | 3730 | -2667 |
| -75,25     | 39,75 | 726,6  | 12 | Sp | 9,4   | -7,0  | 3783 | -2812 |
| -75,25     | 39,75 | 307,6  | 22 | Su | 10,5  | -9,4  | 4205 | -3778 |
| -75,25     | 39,75 | 529,6  | 13 | F  | 10,5  | -8,2  | 4225 | -3294 |
| -75,75     | 39,25 | 32,1   | 5  | W  | 7,9   | -2,4  | 409  | -125  |
| -75,75     | 39,25 | 35,8   | 12 | Sp | 7,9   | -2,6  | 410  | -134  |
| -75,75     | 39,25 | 9,1    | 22 | Su | 5,3   | -3,6  | 275  | -185  |
| -75,75     | 39,25 | 20,1   | 13 | F  | 9,0   | -2,9  | 467  | -150  |
| -76,25     | 39,25 | 1259,2 | 5  | W  | 10,6  | -6,1  | 8381 | -4836 |
| -76,25     | 39,25 | 1404,7 | 12 | Sp | 10,4  | -6,7  | 8234 | -5290 |
| -76,25     | 39,25 | 356,2  | 22 | Su | 4,3   | -3,1  | 3396 | -2447 |
| -76,25     | 39,25 | 788    | 13 | F  | 7,0   | -4,4  | 5508 | -3444 |
| -76,75     | 38,75 | 538,1  | 5  | W  | 28,7  | -16,9 | 3831 | -2258 |
| -76,75     | 38,75 | 443,1  | 13 | Sp | 19,9  | -13,7 | 2655 | -1827 |
| -76,75     | 38,75 | 154,4  | 23 | Su | 7,8   | -5,7  | 1037 | -766  |
| -76,75     | 38,75 | 205,5  | 14 | F  | 10,4  | -6,8  | 1382 | -906  |
| -76,75     | 37,75 | 75,3   | 9  | W  | 16,2  | -8,2  | 589  | -296  |
| -76,75     | 37,75 | 62     | 14 | Sp | 12,0  | -6,9  | 437  | -249  |
| -76,75     | 37,75 | 21,6   | 24 | Su | 7,7   | -6,4  | 280  | -233  |
| -76,75     | 37,75 | 28,8   | 16 | F  | 7,0   | -5,1  | 255  | -187  |
| -76,75     | 39,25 | 147,7  | 5  | W  | 48,0  | -28,8 | 650  | -390  |
| -76,75     | 39,25 | 121,7  | 12 | Sp | 51,5  | -33,7 | 698  | -457  |
| -76,75     | 39,25 | 42,4   | 22 | Su | 50,2  | -43,3 | 681  | -587  |
| -76,75     | 39,25 | 56,4   | 13 | F  | 44,8  | -32,7 | 608  | -444  |
| -77,25     | 38,25 | 62,6   | 5  | W  | 10,8  | -4,7  | 525  | -226  |
| -77,25     | 38,25 | 51,6   | 13 | Sp | 6,5   | -3,8  | 315  | -185  |
| -77,25     | 38,25 | 18     | 23 | Su | 3,5   | -2,4  | 170  | -115  |
| -77,25     | 38,25 | 23,9   | 14 | F  | 3,7   | -2,3  | 181  | -111  |
| -77,75     | 37,25 | 481,3  | 9  | W  | 21,6  | -13,8 | 2969 | -1905 |
| -77,75     | 37,25 | 334,7  | 14 | Sp | 14,9  | -9,7  | 2046 | -1334 |
| -77,75     | 37,25 | 208    | 24 | Su | 13,2  | -10,0 | 1813 | -1374 |
| -77,75     | 37,25 | 206,4  | 16 | F  | 10,6  | -8,1  | 1459 | -1110 |
| <b>SAB</b> |       |        |    |    |       |       |      |       |
| -78,25     | 34,25 | 229,3  | 21 | W  | 129,4 | -70,2 | 1444 | -783  |
| -78,25     | 34,25 | 226,7  | 24 | Sp | 141,5 | -69,0 | 1578 | -770  |
| -78,25     | 34,25 | 120,5  | 28 | Su | 94,1  | -50,6 | 1050 | -565  |
| -78,25     | 34,25 | 144,8  | 25 | F  | 125,1 | -59,9 | 1396 | -669  |
| -79,25     | 33,25 | 104,7  | 17 | W  | 51,2  | -36,7 | 560  | -402  |

|        |       |       |    |    |      |       |      |       |
|--------|-------|-------|----|----|------|-------|------|-------|
| -79,25 | 33,25 | 59,6  | 22 | Sp | 32,6 | -24,3 | 357  | -266  |
| -79,25 | 33,25 | 43,7  | 27 | Su | 49,5 | -49,5 | 541  | -541  |
| -79,25 | 33,25 | 45,7  | 22 | F  | 40,5 | -35,5 | 443  | -389  |
| -79,25 | 33,75 | 400,1 | 17 | W  | 81,7 | -84,7 | 853  | -885  |
| -79,25 | 33,75 | 395,5 | 22 | Sp | 97,7 | -87,6 | 1020 | -915  |
| -79,25 | 33,75 | 210,2 | 27 | Su | 77,3 | -72,2 | 807  | -754  |
| -79,25 | 33,75 | 252,7 | 22 | F  | 83,9 | -70,2 | 876  | -732  |
| -79,75 | 33,25 | 62,8  | 17 | W  | 39,1 | -35,7 | 233  | -212  |
| -79,75 | 33,25 | 35,8  | 22 | Sp | 31,4 | -20,5 | 187  | -122  |
| -79,75 | 33,25 | 26,2  | 27 | Su | 39,5 | -39,3 | 235  | -234  |
| -79,75 | 33,25 | 27,4  | 22 | F  | 41,6 | -35,8 | 248  | -213  |
| -80,25 | 32,75 | 57,7  | 17 | W  | 61,6 | -39,8 | 357  | -231  |
| -80,25 | 32,75 | 32,8  | 22 | Sp | 35,4 | -27,5 | 205  | -159  |
| -80,25 | 32,75 | 24,1  | 27 | Su | 51,7 | -61,1 | 300  | -354  |
| -80,25 | 32,75 | 25,2  | 21 | F  | 46,5 | -41,7 | 269  | -242  |
| -80,25 | 33,25 | 140,5 | 17 | W  | 86,6 | -89,3 | 1845 | -1901 |
| -80,25 | 33,25 | 79,9  | 22 | Sp | 57,6 | -52,8 | 1227 | -1125 |
| -80,25 | 33,25 | 58,6  | 27 | Su | 54,3 | -53,7 | 1157 | -1144 |
| -80,25 | 33,25 | 61,3  | 22 | F  | 52,3 | -48,9 | 1115 | -1042 |
| -80,75 | 32,25 | 39,3  | 17 | W  | 13,2 | -5,7  | 223  | -95   |
| -80,75 | 32,25 | 22,4  | 22 | Sp | 11,1 | -4,1  | 188  | -69   |
| -80,75 | 32,25 | 16,4  | 27 | Su | 15,8 | -11,1 | 267  | -187  |
| -80,75 | 32,25 | 17,2  | 21 | F  | 11,4 | -7,3  | 191  | -123  |
| -80,75 | 32,75 | 117,5 | 17 | W  | 24,8 | -12,6 | 945  | -479  |
| -80,75 | 32,75 | 66,9  | 22 | Sp | 17,7 | -7,4  | 672  | -281  |
| -80,75 | 32,75 | 49    | 27 | Su | 23,0 | -15,1 | 873  | -575  |
| -80,75 | 32,75 | 51,2  | 21 | F  | 17,0 | -10,9 | 646  | -414  |
| -81,25 | 31,75 | 98,5  | 14 | W  | 26,8 | -20,6 | 572  | -441  |
| -81,25 | 31,75 | 97,3  | 22 | Sp | 25,3 | -19,0 | 540  | -406  |
| -81,25 | 31,75 | 51,7  | 28 | Su | 25,3 | -23,5 | 541  | -502  |
| -81,25 | 31,75 | 62,2  | 20 | F  | 25,2 | -20,6 | 539  | -440  |
| -81,25 | 32,25 | 521,3 | 17 | W  | 52,0 | -41,3 | 1575 | -1252 |
| -81,25 | 32,25 | 515,3 | 22 | Sp | 61,9 | -41,9 | 1874 | -1267 |
| -81,25 | 32,25 | 273,8 | 27 | Su | 46,2 | -38,4 | 1397 | -1162 |
| -81,25 | 32,25 | 329,2 | 21 | F  | 46,8 | -35,0 | 1416 | -1061 |
| -81,75 | 30,75 | 25,7  | 21 | W  | 15,4 | -11,6 | 123  | -93   |
| -81,75 | 30,75 | 25,4  | 25 | Sp | 13,1 | -9,1  | 105  | -73   |
| -81,75 | 30,75 | 13,5  | 28 | Su | 23,4 | -22,2 | 188  | -178  |
| -81,75 | 30,75 | 16,2  | 25 | F  | 18,1 | -15,7 | 146  | -126  |
| -81,75 | 31,25 | 24,4  | 14 | W  | 4,4  | -3,0  | 132  | -90   |
| -81,75 | 31,25 | 24,1  | 22 | Sp | 4,6  | -3,1  | 140  | -92   |
| -81,75 | 31,25 | 12,8  | 28 | Su | 7,4  | -6,0  | 225  | -180  |
| -81,75 | 31,25 | 15,4  | 20 | F  | 5,5  | -4,1  | 165  | -123  |
| -81,75 | 31,75 | 479,2 | 14 | W  | 48,8 | -41,7 | 636  | -543  |
| -81,75 | 31,75 | 473,7 | 22 | Sp | 81,9 | -84,7 | 1066 | -1104 |
| -81,75 | 31,75 | 251,7 | 28 | Su | 98,8 | -80,4 | 1287 | -1047 |
| -81,75 | 31,75 | 302,7 | 20 | F  | 61,5 | -62,8 | 801  | -818  |
