# Supplementary material for: Air-water CO 2 evasion from U.S. East Coast estuaries
Source: Copernicus journal article supplement (doi:10.5194/bg-2016-278), 2016-07-18
Supplement: Supplementary file [file bg-2016-278-AC1-supplement.zip]

**Table S3:** Upstream boundary conditions for nutrients and phytoplankton. W, Sp, Su, F correspond to winter, spring, summer and fall, respectively.

| System name | long degrees | lat degree | Season | Phy ( $\mu\text{M C}$ ) | Si ( $\mu\text{M Si}$ ) | NO <sub>3</sub> ( $\mu\text{M N}$ ) | NH <sub>4</sub> ( $\mu\text{M N}$ ) | PO <sub>4</sub> ( $\mu\text{M P}$ ) | O <sub>2</sub> ( $\mu\text{M O}$ ) |
|-------------|--------------|------------|--------|-------------------------|-------------------------|-------------------------------------|-------------------------------------|-------------------------------------|------------------------------------|
| <b>NAR</b>  |              |            |        |                         |                         |                                     |                                     |                                     |                                    |
| -           | -67.25       | 44.75      | W      | 6.21                    | 130.8                   | 43.2                                | 18.5                                | 0.5                                 | 441.3                              |
|             | -67.25       | 44.75      | Sp     | 9.58                    | 130.8                   | 43.2                                | 18.5                                | 0.5                                 | 420.8                              |
|             | -67.25       | 44.75      | Su     | 10.29                   | 130.8                   | 43.2                                | 18.5                                | 0.5                                 | 261.8                              |
|             | -67.25       | 44.75      | F      | 7                       | 130.8                   | 43.2                                | 18.5                                | 0.5                                 | 336.3                              |
| -           | -67.25       | 45.25      | W      | 6.21                    | 148                     | 50.5                                | 21.7                                | 0.6                                 | 441.3                              |
|             | -67.25       | 45.25      | Sp     | 9.58                    | 148                     | 50.5                                | 21.7                                | 0.6                                 | 420.8                              |
|             | -67.25       | 45.25      | Su     | 10.29                   | 148                     | 50.5                                | 21.7                                | 0.6                                 | 261.8                              |
|             | -67.25       | 45.25      | F      | 7                       | 148                     | 50.5                                | 21.7                                | 0.6                                 | 336.3                              |
| -           | -67.25       | 45.25      | W      | 6.21                    | 125.5                   | 55.6                                | 23.8                                | 0.5                                 | 441.3                              |
|             | -67.25       | 45.25      | Sp     | 9.58                    | 125.5                   | 55.6                                | 23.8                                | 0.5                                 | 420.8                              |
|             | -67.25       | 45.25      | Su     | 10.29                   | 125.5                   | 55.6                                | 23.8                                | 0.5                                 | 261.8                              |
|             | -67.25       | 45.25      | F      | 7                       | 125.5                   | 55.6                                | 23.8                                | 0.5                                 | 336.3                              |
| -           | -67.75       | 44.75      | W      | 6.21                    | 149.5                   | 58.5                                | 25.1                                | 0.5                                 | 441.3                              |
|             | -67.75       | 44.75      | Sp     | 9.58                    | 149.5                   | 58.5                                | 25.1                                | 0.5                                 | 420.8                              |
|             | -67.75       | 44.75      | Su     | 10.29                   | 149.5                   | 58.5                                | 25.1                                | 0.5                                 | 261.8                              |
|             | -67.75       | 44.75      | F      | 7                       | 149.5                   | 58.5                                | 25.1                                | 0.5                                 | 336.3                              |
| Penobscot   | -68.25       | 44.75      | W      | 6.21                    | 155.7                   | 109                                 | 46.7                                | 0.4                                 | 441.3                              |
|             | -68.25       | 44.75      | Sp     | 9.58                    | 155.7                   | 109                                 | 46.7                                | 0.4                                 | 420.8                              |
|             | -68.25       | 44.75      | Su     | 10.29                   | 155.7                   | 109                                 | 46.7                                | 0.4                                 | 261.8                              |
|             | -68.25       | 44.75      | F      | 7                       | 155.7                   | 109                                 | 46.7                                | 0.4                                 | 336.3                              |
| Kennebec    | -68.75       | 44.75      | W      | 6.21                    | 142.5                   | 52                                  | 22.3                                | 0.5                                 | 441.3                              |
|             | -68.75       | 44.75      | Sp     | 9.58                    | 142.5                   | 52                                  | 22.3                                | 0.5                                 | 420.8                              |
|             | -68.75       | 44.75      | Su     | 10.29                   | 142.5                   | 52                                  | 22.3                                | 0.5                                 | 261.8                              |
|             | -68.75       | 44.75      | F      | 7                       | 142.5                   | 52                                  | 22.3                                | 0.5                                 | 336.3                              |
| -           | -69.75       | 44.25      | W      | 6.21                    | 133.1                   | 67.1                                | 28.8                                | 3.7                                 | 441.3                              |
|             | -69.75       | 44.25      | Sp     | 9.58                    | 133.1                   | 67.1                                | 28.8                                | 3.7                                 | 420.8                              |
|             | -69.75       | 44.25      | Su     | 10.29                   | 133.1                   | 67.1                                | 28.8                                | 3.7                                 | 261.8                              |
|             | -69.75       | 44.25      | F      | 7                       | 133.1                   | 67.1                                | 28.8                                | 3.7                                 | 336.3                              |
| -           | -70.25       | 43.75      | W      | 21.83                   | 70.4                    | 76.3                                | 32.7                                | 5.1                                 | 359                                |
|             | -70.25       | 43.75      | Sp     | 8                       | 70.4                    | 76.3                                | 32.7                                | 5.1                                 | 312.15                             |
|             | -70.25       | 43.75      | Su     | 19.25                   | 70.4                    | 76.3                                | 32.7                                | 5.1                                 | 265.6                              |
|             | -70.25       | 43.75      | F      | 8.92                    | 70.4                    | 76.3                                | 32.7                                | 5.1                                 | 321.87                             |
| -           | -70.75       | 41.75      | W      | 6.21                    | 93.5                    | 94.8                                | 40.6                                | 12.6                                | 441.3                              |
|             | -70.75       | 41.75      | Sp     | 9.58                    | 93.5                    | 94.8                                | 40.6                                | 12.6                                | 420.8                              |
|             | -70.75       | 41.75      | Su     | 10.29                   | 93.5                    | 94.8                                | 40.6                                | 12.6                                | 261.8                              |
|             | -70.75       | 41.75      | F      | 7                       | 93.5                    | 94.8                                | 40.6                                | 12.6                                | 336.3                              |
| Merrimack   | -70.75       | 42.25      | W      | 6.21                    | 106.9                   | 64.3                                | 27.5                                | 3.4                                 | 441.3                              |
|             | -70.75       | 42.25      | Sp     | 9.58                    | 106.9                   | 64.3                                | 27.5                                | 3.4                                 | 420.8                              |
|             | -70.75       | 42.25      | Su     | 10.29                   | 106.9                   | 64.3                                | 27.5                                | 3.4                                 | 261.8                              |
|             | -70.75       | 42.25      | F      | 7                       | 106.9                   | 64.3                                | 27.5                                | 3.4                                 | 336.3                              |
| <b>MAR</b>  |              |            |        |                         |                         |                                     |                                     |                                     |                                    |
| -           | -70.75       | 43.25      | W      | 6.21                    | 130.2                   | 60.2                                | 25.8                                | 1.3                                 | 441.3                              |
|             | -70.75       | 43.25      | Sp     | 9.58                    | 130.2                   | 60.2                                | 25.8                                | 1.3                                 | 420.8                              |
|             | -70.75       | 43.25      | Su     | 10.29                   | 130.2                   | 60.2                                | 25.8                                | 1.3                                 | 261.8                              |
|             | -70.75       | 43.25      | F      | 7                       | 130.2                   | 60.2                                | 25.8                                | 1.3                                 | 336.3                              |
| -           | -71.25       | 41.75      | W      | 21.83                   | 78.7                    | 122.4                               | 52.4                                | 14.6                                | 359                                |
|             | -71.25       | 41.75      | Sp     | 8                       | 78.7                    | 122.4                               | 52.4                                | 14.6                                | 312.15                             |
|             | -71.25       | 41.75      | Su     | 19.25                   | 78.7                    | 122.4                               | 52.4                                | 14.6                                | 265.6                              |
|             | -71.25       | 41.75      | F      | 8.92                    | 78.7                    | 122.4                               | 52.4                                | 14.6                                | 321.87                             |
| -           | -71.75       | 41.25      | W      | 21.83                   | 104.3                   | 70.1                                | 30.1                                | 2.5                                 | 359                                |
|             | -71.75       | 41.25      | Sp     | 8                       | 104.3                   | 70.1                                | 30.1                                | 2.5                                 | 312.15                             |
|             | -71.75       | 41.25      | Su     | 19.25                   | 104.3                   | 70.1                                | 30.1                                | 2.5                                 | 265.6                              |
|             | -71.75       | 41.25      | F      | 8.92                    | 104.3                   | 70.1                                | 30.1                                | 2.5                                 | 321.87                             |
| -           | -72.75       | 40.75      | W      | 21.83                   | 91                      | 89.3                                | 38.3                                | 6.1                                 | 359                                |

|             |        |       |    |       |       |       |       |      |        |
|-------------|--------|-------|----|-------|-------|-------|-------|------|--------|
|             | -72.75 | 40.75 | Sp | 8     | 91    | 89.3  | 38.3  | 6.1  | 312.15 |
|             | -72.75 | 40.75 | Su | 19.25 | 91    | 89.3  | 38.3  | 6.1  | 265.6  |
|             | -72.75 | 40.75 | F  | 8.92  | 91    | 89.3  | 38.3  | 6.1  | 321.87 |
| -           | -72.75 | 41.25 | W  | 21.83 | 90.5  | 79.3  | 34    | 5.6  | 359    |
|             | -72.75 | 41.25 | Sp | 8     | 90.5  | 79.3  | 34    | 5.6  | 312.15 |
|             | -72.75 | 41.25 | Su | 19.25 | 90.5  | 79.3  | 34    | 5.6  | 265.6  |
|             | -72.75 | 41.25 | F  | 8.92  | 90.5  | 79.3  | 34    | 5.6  | 321.87 |
| Connecticut | -72.75 | 41.75 | W  | 21.83 | 105.9 | 46.2  | 19.8  | 1.5  | 359    |
|             | -72.75 | 41.75 | Sp | 8     | 105.9 | 46.2  | 19.8  | 1.5  | 312.15 |
|             | -72.75 | 41.75 | Su | 19.25 | 105.9 | 46.2  | 19.8  | 1.5  | 265.6  |
|             | -72.75 | 41.75 | F  | 8.92  | 105.9 | 46.2  | 19.8  | 1.5  | 321.87 |
| Hudson      | -74.25 | 40.75 | W  | 21.83 | 84.6  | 82.7  | 35.4  | 9.9  | 359    |
|             | -74.25 | 40.75 | Sp | 8     | 84.6  | 82.7  | 35.4  | 9.9  | 312.15 |
|             | -74.25 | 40.75 | Su | 19.25 | 84.6  | 82.7  | 35.4  | 9.9  | 265.6  |
|             | -74.25 | 40.75 | F  | 8.92  | 84.6  | 82.7  | 35.4  | 9.9  | 321.87 |
| -           | -75.25 | 37.75 | W  | 21.83 | 72.9  | 66.1  | 28.3  | 1.5  | 359    |
|             | -75.25 | 37.75 | Sp | 8     | 72.9  | 66.1  | 28.3  | 1.5  | 312.15 |
|             | -75.25 | 37.75 | Su | 19.25 | 72.9  | 66.1  | 28.3  | 1.5  | 265.6  |
|             | -75.25 | 37.75 | F  | 8.92  | 72.9  | 66.1  | 28.3  | 1.5  | 321.87 |
| -           | -75.25 | 38.75 | W  | 21.83 | 104.7 | 105.5 | 45.2  | 2.2  | 359    |
|             | -75.25 | 38.75 | Sp | 8     | 104.7 | 105.5 | 45.2  | 2.2  | 312.15 |
|             | -75.25 | 38.75 | Su | 19.25 | 104.7 | 105.5 | 45.2  | 2.2  | 265.6  |
|             | -75.25 | 38.75 | F  | 8.92  | 104.7 | 105.5 | 45.2  | 2.2  | 321.87 |
| Delaware    | -75.25 | 39.75 | W  | 21.83 | 89.8  | 101.6 | 43.5  | 7.7  | 359    |
|             | -75.25 | 39.75 | Sp | 8     | 89.8  | 101.6 | 43.5  | 7.7  | 312.15 |
|             | -75.25 | 39.75 | Su | 19.25 | 89.8  | 101.6 | 43.5  | 7.7  | 265.6  |
|             | -75.25 | 39.75 | F  | 8.92  | 89.8  | 101.6 | 43.5  | 7.7  | 321.87 |
| -           | -75.75 | 39.25 | W  | 21.83 | 83.2  | 196.9 | 84.4  | 5.1  | 359    |
|             | -75.75 | 39.25 | Sp | 8     | 83.2  | 196.9 | 84.4  | 5.1  | 312.15 |
|             | -75.75 | 39.25 | Su | 19.25 | 83.2  | 196.9 | 84.4  | 5.1  | 265.6  |
|             | -75.75 | 39.25 | F  | 8.92  | 83.2  | 196.9 | 84.4  | 5.1  | 321.87 |
| Susquehann  | -76.25 | 39.25 | W  | 21.83 | 118.3 | 41.1  | 50    | 2.2  | 359    |
|             | -76.25 | 39.25 | Sp | 8     | 118.3 | 41.1  | 50    | 2.2  | 312.15 |
|             | -76.25 | 39.25 | Su | 19.25 | 118.3 | 41.1  | 50    | 2.2  | 265.6  |
|             | -76.25 | 39.25 | F  | 8.92  | 118.3 | 41.1  | 50    | 2.2  | 321.87 |
| Potomac     | -76.75 | 38.75 | W  | 21.83 | 174.1 | 62.5  | 26.8  | 3.9  | 359    |
|             | -76.75 | 38.75 | Sp | 8     | 174.1 | 62.5  | 26.8  | 3.9  | 312.15 |
|             | -76.75 | 38.75 | Su | 19.25 | 174.1 | 62.5  | 26.8  | 3.9  | 265.6  |
|             | -76.75 | 38.75 | F  | 8.92  | 174.1 | 62.5  | 26.8  | 3.9  | 321.87 |
| -           | -76.75 | 37.75 | W  | 21.83 | 86.3  | 82.8  | 35.5  | 3.9  | 359    |
|             | -76.75 | 37.75 | Sp | 8     | 86.3  | 82.8  | 35.5  | 3.9  | 312.15 |
|             | -76.75 | 37.75 | Su | 19.25 | 86.3  | 82.8  | 35.5  | 3.9  | 265.6  |
|             | -76.75 | 37.75 | F  | 8.92  | 86.3  | 82.8  | 35.5  | 3.9  | 321.87 |
| -           | -76.75 | 39.25 | W  | 21.83 | 120.2 | 252.5 | 108.2 | 22.4 | 359    |
|             | -76.75 | 39.25 | Sp | 8     | 120.2 | 252.5 | 108.2 | 22.4 | 312.15 |
|             | -76.75 | 39.25 | Su | 19.25 | 120.2 | 252.5 | 108.2 | 22.4 | 265.6  |
|             | -76.75 | 39.25 | F  | 8.92  | 120.2 | 252.5 | 108.2 | 22.4 | 321.87 |
| -           | -77.25 | 38.25 | W  | 21.83 | 157.5 | 76.1  | 32.6  | 0.3  | 359    |
|             | -77.25 | 38.25 | Sp | 8     | 157.5 | 76.1  | 32.6  | 0.3  | 312.15 |
|             | -77.25 | 38.25 | Su | 19.25 | 157.5 | 76.1  | 32.6  | 0.3  | 265.6  |
|             | -77.25 | 38.25 | F  | 8.92  | 157.5 | 76.1  | 32.6  | 0.3  | 321.87 |
| James River | -77.75 | 37.25 | W  | 21.83 | 160.3 | 79.9  | 34.3  | 3.8  | 359    |
|             | -77.75 | 37.25 | Sp | 8     | 160.3 | 79.9  | 34.3  | 3.8  | 312.15 |
|             | -77.75 | 37.25 | Su | 19.25 | 160.3 | 79.9  | 34.3  | 3.8  | 265.6  |
|             | -77.75 | 37.25 | F  | 8.92  | 160.3 | 79.9  | 34.3  | 3.8  | 321.87 |
| SAB         |        |       |    |       |       |       |       |      |        |
| -           | -78.25 | 34.25 | W  | 21.83 | 202.2 | 121.7 | 52.1  | 5.6  | 359    |
|             | -78.25 | 34.25 | Sp | 8     | 202.2 | 121.7 | 52.1  | 5.6  | 312.15 |
|             | -78.25 | 34.25 | Su | 19.25 | 202.2 | 121.7 | 52.1  | 5.6  | 265.6  |
|             | -78.25 | 34.25 | F  | 8.92  | 202.2 | 121.7 | 52.1  | 5.6  | 321.87 |
| -           | -79.25 | 33.25 | W  | 26.67 | 153.1 | 98.9  | 42.4  | 1.4  | 226.87 |

|                  |        |       |    |       |       |       |      |     |        |
|------------------|--------|-------|----|-------|-------|-------|------|-----|--------|
|                  | -79.25 | 33.25 | Sp | 32.75 | 153.1 | 98.9  | 42.4 | 1.4 | 197.8  |
|                  | -79.25 | 33.25 | Su | 37.21 | 153.1 | 98.9  | 42.4 | 1.4 | 155.6  |
|                  | -79.25 | 33.25 | F  | 20.75 | 153.1 | 98.9  | 42.4 | 1.4 | 172.5  |
| <b>Pee Dee</b>   | -79.25 | 33.75 | W  | 26.67 | 161   | 40.5  | 17.3 | 1.6 | 226.87 |
|                  | -79.25 | 33.75 | Sp | 32.75 | 161   | 40.5  | 17.3 | 1.6 | 197.8  |
|                  | -79.25 | 33.75 | Su | 37.21 | 161   | 40.5  | 17.3 | 1.6 | 155.6  |
|                  | -79.25 | 33.75 | F  | 20.75 | 161   | 40.5  | 17.3 | 1.6 | 172.5  |
| -                | -79.75 | 33.25 | W  | 26.67 | 180.2 | 61.8  | 26.5 | 0.5 | 226.87 |
|                  | -79.75 | 33.25 | Sp | 32.75 | 180.2 | 61.8  | 26.5 | 0.5 | 197.8  |
|                  | -79.75 | 33.25 | Su | 37.21 | 180.2 | 61.8  | 26.5 | 0.5 | 155.6  |
|                  | -79.75 | 33.25 | F  | 20.75 | 180.2 | 61.8  | 26.5 | 0.5 | 172.5  |
| -                | -80.25 | 32.75 | W  | 26.67 | 225.1 | 73.3  | 31.4 | 3.3 | 226.87 |
|                  | -80.25 | 32.75 | Sp | 32.75 | 225.1 | 73.3  | 31.4 | 3.3 | 197.8  |
|                  | -80.25 | 32.75 | Su | 37.21 | 225.1 | 73.3  | 31.4 | 3.3 | 155.6  |
|                  | -80.25 | 32.75 | F  | 20.75 | 225.1 | 73.3  | 31.4 | 3.3 | 172.5  |
| <b>Santee</b>    | -80.25 | 33.25 | W  | 26.67 | 320.9 | 188.7 | 80.9 | 4.9 | 226.87 |
|                  | -80.25 | 33.25 | Sp | 32.75 | 320.9 | 188.7 | 80.9 | 4.9 | 197.8  |
|                  | -80.25 | 33.25 | Su | 37.21 | 320.9 | 188.7 | 80.9 | 4.9 | 155.6  |
|                  | -80.25 | 33.25 | F  | 20.75 | 320.9 | 188.7 | 80.9 | 4.9 | 172.5  |
| <b>Roanoke</b>   | -80.75 | 32.25 | W  | 26.67 | 204.4 | 44.6  | 19.1 | 0.3 | 226.87 |
|                  | -80.75 | 32.25 | Sp | 32.75 | 204.4 | 44.6  | 19.1 | 0.3 | 197.8  |
|                  | -80.75 | 32.25 | Su | 37.21 | 204.4 | 44.6  | 19.1 | 0.3 | 155.6  |
|                  | -80.75 | 32.25 | F  | 20.75 | 204.4 | 44.6  | 19.1 | 0.3 | 172.5  |
| -                | -80.75 | 32.75 | W  | 26.67 | 207.7 | 99.3  | 42.6 | 1.9 | 226.87 |
|                  | -80.75 | 32.75 | Sp | 32.75 | 207.7 | 99.3  | 42.6 | 1.9 | 197.8  |
|                  | -80.75 | 32.75 | Su | 37.21 | 207.7 | 99.3  | 42.6 | 1.9 | 155.6  |
|                  | -80.75 | 32.75 | F  | 20.75 | 207.7 | 99.3  | 42.6 | 1.9 | 172.5  |
| -                | -81.25 | 31.75 | W  | 26.67 | 222.4 | 74.1  | 31.7 | 0.9 | 226.87 |
|                  | -81.25 | 31.75 | Sp | 32.75 | 222.4 | 74.1  | 31.7 | 0.9 | 197.8  |
|                  | -81.25 | 31.75 | Su | 37.21 | 222.4 | 74.1  | 31.7 | 0.9 | 155.6  |
|                  | -81.25 | 31.75 | F  | 20.75 | 222.4 | 74.1  | 31.7 | 0.9 | 172.5  |
| <b>Savannah</b>  | -81.25 | 32.25 | W  | 26.67 | 21.4  | 36.4  | 15.6 | 0.2 | 226.87 |
|                  | -81.25 | 32.25 | Sp | 32.75 | 21.4  | 36.4  | 15.6 | 0.2 | 197.8  |
|                  | -81.25 | 32.25 | Su | 37.21 | 21.4  | 36.4  | 15.6 | 0.2 | 155.6  |
|                  | -81.25 | 32.25 | F  | 20.75 | 21.4  | 36.4  | 15.6 | 0.2 | 172.5  |
| -                | -81.75 | 30.75 | W  | 26.67 | 224.6 | 65.1  | 27.9 | 0.2 | 226.87 |
|                  | -81.75 | 30.75 | Sp | 32.75 | 224.6 | 65.1  | 27.9 | 0.2 | 197.8  |
|                  | -81.75 | 30.75 | Su | 37.21 | 224.6 | 65.1  | 27.9 | 0.2 | 155.6  |
|                  | -81.75 | 30.75 | F  | 20.75 | 224.6 | 65.1  | 27.9 | 0.2 | 172.5  |
| -                | -81.75 | 31.25 | W  | 26.67 | 186.7 | 67.6  | 29   | 0.2 | 226.87 |
|                  | -81.75 | 31.25 | Sp | 32.75 | 186.7 | 67.6  | 29   | 0.2 | 197.8  |
|                  | -81.75 | 31.25 | Su | 37.21 | 186.7 | 67.6  | 29   | 0.2 | 155.6  |
|                  | -81.75 | 31.25 | F  | 20.75 | 186.7 | 67.6  | 29   | 0.2 | 172.5  |
| <b>Althamaha</b> | -81.75 | 31.75 | W  | 26.67 | 171.5 | 53.7  | 23   | 1.4 | 226.87 |
|                  | -81.75 | 31.75 | Sp | 32.75 | 171.5 | 53.7  | 23   | 1.4 | 197.8  |
|                  | -81.75 | 31.75 | Su | 37.21 | 171.5 | 53.7  | 23   | 1.4 | 155.6  |
|                  | -81.75 | 31.75 | F  | 20.75 | 171.5 | 53.7  | 23   | 1.4 | 172.5  |
