# Supplementary material for: Air-water CO 2 evasion from U.S. East Coast estuaries
Source: Copernicus journal article supplement (doi:10.5194/bg-2016-278), 2016-07-18
Supplement: Supplementary file [file bg-2016-278-AC1-supplement.zip]

**Table S5:** Upstream boundary conditions for the carbonate system. W, Sp, Su and F correspond to winter, spring, summer and fall, respectively.

| System<br>name   | long<br>degrees | lat<br>degree | Season | SPM<br>(g L <sup>-1</sup> ) | TOC<br>(μM C) | DIC<br>(μM C) | Alk<br>(μM C) | pH<br>- |
|------------------|-----------------|---------------|--------|-----------------------------|---------------|---------------|---------------|---------|
| <b>NAR</b>       |                 |               |        |                             |               |               |               |         |
| -                | -67.25          | 44.75         | W      | 0                           | 264           | 363           | 339           | 7.67    |
|                  | -67.25          | 44.75         | Sp     | 0                           | 264           | 250           | 228           | 7.51    |
|                  | -67.25          | 44.75         | Su     | 0                           | 264           | 313           | 295           | 7.65    |
|                  | -67.25          | 44.75         | F      | 0                           | 264           | 295           | 276           | 7.61    |
| -                | -67.25          | 45.25         | W      | 0.0284                      | 412           | 450           | 426           | 7.77    |
|                  | -67.25          | 45.25         | Sp     | 0.0284                      | 412           | 364           | 341           | 7.68    |
|                  | -67.25          | 45.25         | Su     | 0.0284                      | 412           | 352           | 356           | 8.72    |
|                  | -67.25          | 45.25         | F      | 0.0284                      | 412           | 474           | 454           | 7.82    |
| -                | -67.25          | 45.25         | W      | 0.0257                      | 346           | 604           | 580           | 7.90    |
|                  | -67.25          | 45.25         | Sp     | 0.0257                      | 346           | 539           | 517           | 7.86    |
|                  | -67.25          | 45.25         | Su     | 0.0257                      | 346           | 708           | 692           | 8.02    |
|                  | -67.25          | 45.25         | F      | 0.0257                      | 346           | 619           | 601           | 7.94    |
| -                | -67.75          | 44.75         | W      | 0.0307                      | 343           | 363           | 339           | 7.67    |
|                  | -67.75          | 44.75         | Sp     | 0.0307                      | 343           | 250           | 228           | 7.51    |
|                  | -67.75          | 44.75         | Su     | 0.0307                      | 343           | 313           | 295           | 7.65    |
|                  | -67.75          | 44.75         | F      | 0.0307                      | 343           | 295           | 276           | 7.61    |
| <b>Penobscot</b> | -68.25          | 44.75         | W      | 0.0456                      | 339           | 363           | 339           | 7.67    |
|                  | -68.25          | 44.75         | Sp     | 0.0456                      | 339           | 250           | 228           | 7.51    |
|                  | -68.25          | 44.75         | Su     | 0.0456                      | 339           | 313           | 295           | 7.65    |
|                  | -68.25          | 44.75         | F      | 0.0456                      | 339           | 295           | 276           | 7.61    |
| <b>Kennebec</b>  | -68.75          | 44.75         | W      | 0.0361                      | 358           | 399           | 374           | 7.71    |
|                  | -68.75          | 44.75         | Sp     | 0.0361                      | 358           | 342           | 319           | 7.65    |
|                  | -68.75          | 44.75         | Su     | 0.0361                      | 358           | 361           | 342           | 7.71    |
|                  | -68.75          | 44.75         | F      | 0.0361                      | 358           | 382           | 362           | 7.73    |
| -                | -69.75          | 44.25         | W      | 0.0142                      | 406           | 339           | 311           | 7.62    |
|                  | -69.75          | 44.25         | Sp     | 0.0142                      | 406           | 303           | 275           | 7.56    |
|                  | -69.75          | 44.25         | Su     | 0.0142                      | 406           | 422           | 394           | 7.72    |
|                  | -69.75          | 44.25         | F      | 0.0142                      | 406           | 337           | 309           | 7.61    |
| -                | -70.25          | 43.75         | W      | 0                           | 241           | 634           | 612           | 7.93    |
|                  | -70.25          | 43.75         | Sp     | 0                           | 241           | 634           | 615           | 7.95    |
|                  | -70.25          | 43.75         | Su     | 0                           | 241           | 947           | 936           | 8.17    |
|                  | -70.25          | 43.75         | F      | 0                           | 241           | 735           | 718           | 8.03    |
| -                | -70.75          | 41.75         | W      | 0.0131                      | 327           | 634           | 612           | 7.93    |
|                  | -70.75          | 41.75         | Sp     | 0.0131                      | 327           | 634           | 616           | 7.95    |
|                  | -70.75          | 41.75         | Su     | 0.0131                      | 327           | 947           | 938           | 8.18    |
|                  | -70.75          | 41.75         | F      | 0.0131                      | 327           | 735           | 718           | 8.03    |
| <b>Merrimack</b> | -70.75          | 42.25         | W      | 0.0314                      | 382           | 339           | 316           | 7.65    |
|                  | -70.75          | 42.25         | Sp     | 0.0314                      | 382           | 303           | 283           | 7.62    |
|                  | -70.75          | 42.25         | Su     | 0.0314                      | 382           | 422           | 408           | 7.82    |
|                  | -70.75          | 42.25         | F      | 0.0314                      | 382           | 337           | 318           | 7.67    |
| <b>MAR</b>       |                 |               |        |                             |               |               |               |         |
| -                | -70.75          | 43.25         | W      | 0.0285                      | 374           | 339           | 315           | 7.64    |
|                  | -70.75          | 43.25         | Sp     | 0.0285                      | 374           | 303           | 282           | 7.61    |
|                  | -70.75          | 43.25         | Su     | 0.0285                      | 374           | 422           | 406           | 7.80    |
|                  | -70.75          | 43.25         | F      | 0.0285                      | 374           | 337           | 318           | 7.67    |
| -                | -71.25          | 41.75         | W      | 0                           | 237           | 634           | 612           | 7.93    |
|                  | -71.25          | 41.75         | Sp     | 0                           | 237           | 634           | 615           | 7.95    |
|                  | -71.25          | 41.75         | Su     | 0                           | 237           | 947           | 936           | 8.17    |
|                  | -71.25          | 41.75         | F      | 0                           | 237           | 735           | 718           | 8.03    |
| -                | -71.75          | 41.25         | W      | 0.009                       | 335           | 546           | 523           | 7.86    |
|                  | -71.75          | 41.25         | Sp     | 0.009                       | 335           | 307           | 286           | 7.62    |
|                  | -71.75          | 41.25         | Su     | 0.009                       | 335           | 464           | 449           | 7.85    |
|                  | -71.75          | 41.25         | F      | 0.009                       | 335           | 377           | 358           | 7.73    |
| -                | -72.75          | 40.75         | W      | 0                           | 322           | 2234          | 2231          | 8.49    |

|             |        |       |    |        |     |      |      |      |
|-------------|--------|-------|----|--------|-----|------|------|------|
|             | -72.75 | 40.75 | Sp | 0      | 322 | 1920 | 1918 | 8.45 |
|             | -72.75 | 40.75 | Su | 0      | 322 | 2414 | 2443 | 8.60 |
|             | -72.75 | 40.75 | F  | 0      | 322 | 2708 | 2729 | 8.61 |
| -           | -72.75 | 41.25 | W  | 0.018  | 367 | 2234 | 2230 | 8.49 |
|             | -72.75 | 41.25 | Sp | 0.018  | 367 | 1920 | 1915 | 8.44 |
|             | -72.75 | 41.25 | Su | 0.018  | 367 | 2414 | 2433 | 8.58 |
|             | -72.75 | 41.25 | F  | 0.018  | 367 | 2708 | 2723 | 8.60 |
| Connecticut | -72.75 | 41.75 | W  | 0.0401 | 374 | 604  | 581  | 7.91 |
|             | -72.75 | 41.75 | Sp | 0.0401 | 374 | 539  | 520  | 7.88 |
|             | -72.75 | 41.75 | Su | 0.0401 | 374 | 708  | 694  | 8.04 |
|             | -72.75 | 41.75 | F  | 0.0401 | 374 | 619  | 602  | 7.95 |
| Hudson      | -74.25 | 40.75 | W  | 0.0329 | 360 | 1175 | 1157 | 8.21 |
|             | -74.25 | 40.75 | Sp | 0.0329 | 360 | 1116 | 1102 | 8.21 |
|             | -74.25 | 40.75 | Su | 0.0329 | 360 | 1187 | 1183 | 8.30 |
|             | -74.25 | 40.75 | F  | 0.0329 | 360 | 1086 | 1074 | 8.21 |
| -           | -75.25 | 37.75 | W  | 0.0252 | 430 | 1195 | 1181 | 8.23 |
|             | -75.25 | 37.75 | Sp | 0.0252 | 430 | 1094 | 1084 | 8.22 |
|             | -75.25 | 37.75 | Su | 0.0252 | 430 | 941  | 935  | 8.21 |
|             | -75.25 | 37.75 | F  | 0.0252 | 430 | 1413 | 1408 | 8.34 |
| -           | -75.25 | 38.75 | W  | 0.0441 | 419 | 1195 | 1178 | 8.22 |
|             | -75.25 | 38.75 | Sp | 0.0441 | 419 | 1094 | 1083 | 8.22 |
|             | -75.25 | 38.75 | Su | 0.0441 | 419 | 941  | 935  | 8.21 |
|             | -75.25 | 38.75 | F  | 0.0441 | 419 | 1413 | 1407 | 8.33 |
| Delaware    | -75.25 | 39.75 | W  | 0.0381 | 420 | 754  | 732  | 8.01 |
|             | -75.25 | 39.75 | Sp | 0.0381 | 420 | 768  | 752  | 8.05 |
|             | -75.25 | 39.75 | Su | 0.0381 | 420 | 1000 | 994  | 8.23 |
|             | -75.25 | 39.75 | F  | 0.0381 | 420 | 922  | 909  | 8.14 |
| -           | -75.75 | 39.25 | W  | 0.0376 | 383 | 1150 | 1131 | 8.20 |
|             | -75.75 | 39.25 | Sp | 0.0376 | 383 | 1112 | 1100 | 8.22 |
|             | -75.75 | 39.25 | Su | 0.0376 | 383 | 1075 | 1071 | 8.26 |
|             | -75.75 | 39.25 | F  | 0.0376 | 383 | 1869 | 1870 | 8.45 |
| Susquehann  | -76.25 | 39.25 | W  | 0.0558 | 486 | 887  | 867  | 8.08 |
|             | -76.25 | 39.25 | Sp | 0.0558 | 486 | 818  | 803  | 8.08 |
|             | -76.25 | 39.25 | Su | 0.0558 | 486 | 1091 | 1087 | 8.27 |
|             | -76.25 | 39.25 | F  | 0.0558 | 486 | 1033 | 1021 | 8.19 |
| Potomac     | -76.75 | 38.75 | W  | 0.0969 | 553 | 1406 | 1390 | 8.29 |
|             | -76.75 | 38.75 | Sp | 0.0969 | 553 | 1325 | 1317 | 8.30 |
|             | -76.75 | 38.75 | Su | 0.0969 | 553 | 1526 | 1532 | 8.42 |
|             | -76.75 | 38.75 | F  | 0.0969 | 553 | 1621 | 1618 | 8.39 |
| -           | -76.75 | 37.75 | W  | 0.0451 | 466 | 515  | 496  | 7.86 |
|             | -76.75 | 37.75 | Sp | 0.0451 | 466 | 456  | 441  | 7.84 |
|             | -76.75 | 37.75 | Su | 0.0451 | 466 | 447  | 436  | 7.88 |
|             | -76.75 | 37.75 | F  | 0.0451 | 466 | 372  | 356  | 7.75 |
| -           | -76.75 | 39.25 | W  | 0.0434 | 412 | 915  | 895  | 8.10 |
|             | -76.75 | 39.25 | Sp | 0.0434 | 412 | 909  | 895  | 8.13 |
|             | -76.75 | 39.25 | Su | 0.0434 | 412 | 984  | 978  | 8.22 |
|             | -76.75 | 39.25 | F  | 0.0434 | 412 | 1003 | 991  | 8.18 |
| -           | -77.25 | 38.25 | W  | 0.0259 | 455 | 723  | 701  | 7.99 |
|             | -77.25 | 38.25 | Sp | 0.0259 | 455 | 482  | 465  | 7.85 |
|             | -77.25 | 38.25 | Su | 0.0259 | 455 | 490  | 479  | 7.92 |
|             | -77.25 | 38.25 | F  | 0.0259 | 455 | 460  | 444  | 7.84 |
| James River | -77.75 | 37.25 | W  | 0.0441 | 492 | 650  | 631  | 7.96 |
|             | -77.75 | 37.25 | Sp | 0.0441 | 492 | 692  | 677  | 8.02 |
|             | -77.75 | 37.25 | Su | 0.0441 | 492 | 736  | 729  | 8.11 |
|             | -77.75 | 37.25 | F  | 0.0441 | 492 | 634  | 620  | 7.99 |
| SAB         |        |       |    |        |     |      |      |      |
| -           | -78.25 | 34.25 | W  | 0.0265 | 433 | 566  | 555  | 7.98 |
|             | -78.25 | 34.25 | Sp | 0.0265 | 433 | 680  | 672  | 8.07 |
|             | -78.25 | 34.25 | Su | 0.0265 | 433 | 692  | 686  | 8.10 |
|             | -78.25 | 34.25 | F  | 0.0265 | 433 | 897  | 892  | 8.20 |
| -           | -79.25 | 33.25 | W  | 0.0534 | 401 | 394  | 379  | 7.79 |

|                  |        |       |    |        |     |      |      |      |
|------------------|--------|-------|----|--------|-----|------|------|------|
|                  | -79.25 | 33.25 | Sp | 0.0534 | 401 | 532  | 521  | 7.95 |
|                  | -79.25 | 33.25 | Su | 0.0534 | 401 | 511  | 502  | 7.96 |
|                  | -79.25 | 33.25 | F  | 0.0534 | 401 | 626  | 616  | 8.02 |
| <b>Pee Dee</b>   | -79.25 | 33.75 | W  | 0.0329 | 292 | 394  | 379  | 7.79 |
|                  | -79.25 | 33.75 | Sp | 0.0329 | 292 | 532  | 521  | 7.95 |
|                  | -79.25 | 33.75 | Su | 0.0329 | 292 | 511  | 502  | 7.96 |
|                  | -79.25 | 33.75 | F  | 0.0329 | 292 | 626  | 616  | 8.02 |
| -                | -79.75 | 33.25 | W  | 0.0668 | 445 | 394  | 379  | 7.79 |
|                  | -79.75 | 33.25 | Sp | 0.0668 | 445 | 532  | 521  | 7.95 |
|                  | -79.75 | 33.25 | Su | 0.0668 | 445 | 511  | 502  | 7.96 |
|                  | -79.75 | 33.25 | F  | 0.0668 | 445 | 626  | 616  | 8.02 |
| -                | -80.25 | 32.75 | W  | 0.0742 | 406 | 683  | 670  | 8.03 |
|                  | -80.25 | 32.75 | Sp | 0.0742 | 406 | 531  | 520  | 7.95 |
|                  | -80.25 | 32.75 | Su | 0.0742 | 406 | 444  | 435  | 7.90 |
|                  | -80.25 | 32.75 | F  | 0.0742 | 406 | 591  | 580  | 7.99 |
| <b>Santee</b>    | -80.25 | 33.25 | W  | 0.0723 | 179 | 394  | 379  | 7.79 |
|                  | -80.25 | 33.25 | Sp | 0.0723 | 179 | 532  | 521  | 7.95 |
|                  | -80.25 | 33.25 | Su | 0.0723 | 179 | 511  | 502  | 7.96 |
|                  | -80.25 | 33.25 | F  | 0.0723 | 179 | 626  | 616  | 8.02 |
| <b>Roanoke</b>   | -80.75 | 32.25 | W  | 0      | 203 | 699  | 686  | 8.04 |
|                  | -80.75 | 32.25 | Sp | 0      | 203 | 1060 | 1056 | 8.26 |
|                  | -80.75 | 32.25 | Su | 0      | 203 | 1255 | 1259 | 8.36 |
|                  | -80.75 | 32.25 | F  | 0      | 203 | 717  | 707  | 8.08 |
| -                | -80.75 | 32.75 | W  | 0.0662 | 447 | 699  | 686  | 8.04 |
|                  | -80.75 | 32.75 | Sp | 0.0662 | 447 | 1060 | 1056 | 8.26 |
|                  | -80.75 | 32.75 | Su | 0.0662 | 447 | 1255 | 1259 | 8.36 |
|                  | -80.75 | 32.75 | F  | 0.0662 | 447 | 717  | 707  | 8.08 |
| -                | -81.25 | 31.75 | W  | 0.0877 | 505 | 441  | 425  | 7.82 |
|                  | -81.25 | 31.75 | Sp | 0.0877 | 505 | 586  | 576  | 8.00 |
|                  | -81.25 | 31.75 | Su | 0.0877 | 505 | 704  | 698  | 8.11 |
|                  | -81.25 | 31.75 | F  | 0.0877 | 505 | 664  | 653  | 8.03 |
| <b>Savannah</b>  | -81.25 | 32.25 | W  | 0.0046 | 300 | 497  | 483  | 7.89 |
|                  | -81.25 | 32.25 | Sp | 0.0046 | 300 | 545  | 534  | 7.96 |
|                  | -81.25 | 32.25 | Su | 0.0046 | 300 | 487  | 478  | 7.95 |
|                  | -81.25 | 32.25 | F  | 0.0046 | 300 | 538  | 526  | 7.95 |
| -                | -81.75 | 30.75 | W  | 0.029  | 324 | 470  | 458  | 7.89 |
|                  | -81.75 | 30.75 | Sp | 0.029  | 324 | 745  | 737  | 8.12 |
|                  | -81.75 | 30.75 | Su | 0.029  | 324 | 751  | 746  | 8.14 |
|                  | -81.75 | 30.75 | F  | 0.029  | 324 | 882  | 877  | 8.19 |
| -                | -81.75 | 31.25 | W  | 0.0286 | 322 | 470  | 454  | 7.85 |
|                  | -81.75 | 31.25 | Sp | 0.0286 | 322 | 745  | 736  | 8.10 |
|                  | -81.75 | 31.25 | Su | 0.0286 | 322 | 751  | 746  | 8.14 |
|                  | -81.75 | 31.25 | F  | 0.0286 | 322 | 882  | 874  | 8.16 |
| <b>Althamaha</b> | -81.75 | 31.75 | W  | 0.03   | 429 | 470  | 454  | 7.85 |
|                  | -81.75 | 31.75 | Sp | 0.03   | 429 | 745  | 736  | 8.10 |
|                  | -81.75 | 31.75 | Su | 0.03   | 429 | 751  | 746  | 8.14 |
|                  | -81.75 | 31.75 | F  | 0.03   | 429 | 882  | 874  | 8.16 |
