# Supplementary material for: Air-water CO 2 evasion from U.S. East Coast estuaries
Source: Copernicus journal article supplement (doi:10.5194/bg-2016-278), 2016-07-18
Supplement: Supplementary file [file bg-2016-278-AC1-supplement.zip]

**Table S6:** Downstream boundary conditions for the carbonate system. W, Sp, Su and F correspond to winter, spring, summer and fall, respectively.

| System<br>name   | long<br>degrees | lat<br>degree | Season | SPM<br>(g L <sup>-1</sup> ) | TOC<br>(μM C) | DIC<br>(μM C) | Alk<br>(μM C) | pH<br>- |
|------------------|-----------------|---------------|--------|-----------------------------|---------------|---------------|---------------|---------|
| <b>NAR</b>       |                 |               |        |                             |               |               |               |         |
| -                | -67.25          | 44.75         | W      | 0.03                        | 0.01          | 1992          | 2111.5        | 7       |
|                  | -67.25          | 44.75         | Sp     | 0.03                        | 0.01          | 1992          | 2125.6        | 7       |
|                  | -67.25          | 44.75         | Su     | 0.03                        | 0.01          | 1992          | 2170.8        | 7       |
|                  | -67.25          | 44.75         | F      | 0.03                        | 0.01          | 1992          | 2153.9        | 7       |
| -                | -67.25          | 45.25         | W      | 0.03                        | 0.01          | 1992          | 2111.5        | 7       |
|                  | -67.25          | 45.25         | Sp     | 0.03                        | 0.01          | 1992          | 2125.6        | 7       |
|                  | -67.25          | 45.25         | Su     | 0.03                        | 0.01          | 1992          | 2170.8        | 7       |
|                  | -67.25          | 45.25         | F      | 0.03                        | 0.01          | 1992          | 2153.9        | 7       |
| -                | -67.25          | 45.25         | W      | 0.03                        | 0.01          | 1992          | 2111.5        | 7       |
|                  | -67.25          | 45.25         | Sp     | 0.03                        | 0.01          | 1992          | 2125.6        | 7       |
|                  | -67.25          | 45.25         | Su     | 0.03                        | 0.01          | 1992          | 2170.8        | 7       |
|                  | -67.25          | 45.25         | F      | 0.03                        | 0.01          | 1992          | 2153.9        | 7       |
| -                | -67.75          | 44.75         | W      | 0.03                        | 0.01          | 1992          | 2111.5        | 7       |
|                  | -67.75          | 44.75         | Sp     | 0.03                        | 0.01          | 1992          | 2125.6        | 7       |
|                  | -67.75          | 44.75         | Su     | 0.03                        | 0.01          | 1992          | 2170.8        | 7       |
|                  | -67.75          | 44.75         | F      | 0.03                        | 0.01          | 1992          | 2153.9        | 7       |
| <b>Penobscot</b> | -68.25          | 44.75         | W      | 0.03                        | 0.01          | 1992          | 2111.5        | 7       |
|                  | -68.25          | 44.75         | Sp     | 0.03                        | 0.01          | 1992          | 2125.6        | 7       |
|                  | -68.25          | 44.75         | Su     | 0.03                        | 0.01          | 1992          | 2170.8        | 7       |
|                  | -68.25          | 44.75         | F      | 0.03                        | 0.01          | 1992          | 2153.9        | 7       |
| <b>Kennebec</b>  | -68.75          | 44.75         | W      | 0.03                        | 0.01          | 1995          | 2114.8        | 7       |
|                  | -68.75          | 44.75         | Sp     | 0.03                        | 0.01          | 1995          | 2128.9        | 7       |
|                  | -68.75          | 44.75         | Su     | 0.03                        | 0.01          | 1995          | 2174.3        | 7       |
|                  | -68.75          | 44.75         | F      | 0.03                        | 0.01          | 1995          | 2157.3        | 7       |
| -                | -69.75          | 44.25         | W      | 0.03                        | 0.01          | 1992          | 2088.9        | 7       |
|                  | -69.75          | 44.25         | Sp     | 0.03                        | 0.01          | 1992          | 2088.9        | 7       |
|                  | -69.75          | 44.25         | Su     | 0.03                        | 0.01          | 1992          | 2090.4        | 7       |
|                  | -69.75          | 44.25         | F      | 0.03                        | 0.01          | 1992          | 2090.1        | 7       |
| -                | -70.25          | 43.75         | W      | 0.03                        | 0.01          | 1998          | 2129.8        | 7       |
|                  | -70.25          | 43.75         | Sp     | 0.03                        | 0.01          | 1998          | 2151.6        | 7       |
|                  | -70.25          | 43.75         | Su     | 0.03                        | 0.01          | 1998          | 2208.8        | 7       |
|                  | -70.25          | 43.75         | F      | 0.03                        | 0.01          | 1998          | 2168.6        | 7       |
| -                | -70.75          | 41.75         | W      | 0.03                        | 0.01          | 1998          | 2131.9        | 7       |
|                  | -70.75          | 41.75         | Sp     | 0.03                        | 0.01          | 1998          | 2155.3        | 7       |
|                  | -70.75          | 41.75         | Su     | 0.03                        | 0.01          | 1998          | 2227.1        | 7       |
|                  | -70.75          | 41.75         | F      | 0.03                        | 0.01          | 1998          | 2168.5        | 7       |
| <b>Merrimack</b> | -70.75          | 42.25         | W      | 0.03                        | 0.01          | 1997          | 2130.8        | 7       |
|                  | -70.75          | 42.25         | Sp     | 0.03                        | 0.01          | 1997          | 2154.1        | 7       |
|                  | -70.75          | 42.25         | Su     | 0.03                        | 0.01          | 1997          | 2225.9        | 7       |
|                  | -70.75          | 42.25         | F      | 0.03                        | 0.01          | 1997          | 2167.4        | 7       |
| <b>MAR</b>       |                 |               |        |                             |               |               |               |         |
| -                | -70.75          | 43.25         | W      | 0.03                        | 0.01          | 1997          | 2121.6        | 7       |
|                  | -70.75          | 43.25         | Sp     | 0.03                        | 0.01          | 1997          | 2140.8        | 7       |
|                  | -70.75          | 43.25         | Su     | 0.03                        | 0.01          | 1997          | 2196.3        | 7       |
|                  | -70.75          | 43.25         | F      | 0.03                        | 0.01          | 1997          | 2161.8        | 7       |
| -                | -71.25          | 41.75         | W      | 0.03                        | 0.01          | 1998          | 2129.8        | 7       |
|                  | -71.25          | 41.75         | Sp     | 0.03                        | 0.01          | 1998          | 2151.6        | 7       |
|                  | -71.25          | 41.75         | Su     | 0.03                        | 0.01          | 1998          | 2208.8        | 7       |
|                  | -71.25          | 41.75         | F      | 0.03                        | 0.01          | 1998          | 2168.6        | 7       |
| -                | -71.75          | 41.25         | W      | 0.03                        | 0.01          | 1998          | 2129.8        | 7       |
|                  | -71.75          | 41.25         | Sp     | 0.03                        | 0.01          | 1998          | 2151.6        | 7       |
|                  | -71.75          | 41.25         | Su     | 0.03                        | 0.01          | 1998          | 2208.8        | 7       |
|                  | -71.75          | 41.25         | F      | 0.03                        | 0.01          | 1998          | 2168.6        | 7       |
| -                | -72.75          | 40.75         | W      | 0.03                        | 0.01          | 1996          | 2129.9        | 7       |

|             |        |       |    |      |      |      |        |   |
|-------------|--------|-------|----|------|------|------|--------|---|
|             | -72.75 | 40.75 | Sp | 0.03 | 0.01 | 1996 | 2164.5 | 7 |
|             | -72.75 | 40.75 | Su | 0.03 | 0.01 | 1996 | 2250.6 | 7 |
|             | -72.75 | 40.75 | F  | 0.03 | 0.01 | 1996 | 2189.1 | 7 |
| -           | -72.75 | 41.25 | W  | 0.03 | 0.01 | 1996 | 2127.6 | 7 |
|             | -72.75 | 41.25 | Sp | 0.03 | 0.01 | 1996 | 2149.3 | 7 |
|             | -72.75 | 41.25 | Su | 0.03 | 0.01 | 1996 | 2206.4 | 7 |
|             | -72.75 | 41.25 | F  | 0.03 | 0.01 | 1996 | 2166.3 | 7 |
| Connecticut | -72.75 | 41.75 | W  | 0.03 | 0.01 | 1998 | 2129.8 | 7 |
|             | -72.75 | 41.75 | Sp | 0.03 | 0.01 | 1998 | 2151.6 | 7 |
|             | -72.75 | 41.75 | Su | 0.03 | 0.01 | 1998 | 2208.8 | 7 |
|             | -72.75 | 41.75 | F  | 0.03 | 0.01 | 1998 | 2168.6 | 7 |
| Hudson      | -74.25 | 40.75 | W  | 0.03 | 0.01 | 1996 | 2129.9 | 7 |
|             | -74.25 | 40.75 | Sp | 0.03 | 0.01 | 1996 | 2164.5 | 7 |
|             | -74.25 | 40.75 | Su | 0.03 | 0.01 | 1996 | 2250.6 | 7 |
|             | -74.25 | 40.75 | F  | 0.03 | 0.01 | 1996 | 2189.1 | 7 |
| -           | -75.25 | 37.75 | W  | 0.03 | 0.01 | 2002 | 2159.5 | 7 |
|             | -75.25 | 37.75 | Sp | 0.03 | 0.01 | 2002 | 2198.2 | 7 |
|             | -75.25 | 37.75 | Su | 0.03 | 0.01 | 2002 | 2286.3 | 7 |
|             | -75.25 | 37.75 | F  | 0.03 | 0.01 | 2002 | 2216.1 | 7 |
| -           | -75.25 | 38.75 | W  | 0.03 | 0.01 | 2002 | 2135.5 | 7 |
|             | -75.25 | 38.75 | Sp | 0.03 | 0.01 | 2002 | 2186.7 | 7 |
|             | -75.25 | 38.75 | Su | 0.03 | 0.01 | 2002 | 2274.5 | 7 |
|             | -75.25 | 38.75 | F  | 0.03 | 0.01 | 2002 | 2199.6 | 7 |
| Delaware    | -75.25 | 39.75 | W  | 0.03 | 0.01 | 1999 | 2134.1 | 7 |
|             | -75.25 | 39.75 | Sp | 0.03 | 0.01 | 1999 | 2179.1 | 7 |
|             | -75.25 | 39.75 | Su | 0.03 | 0.01 | 1999 | 2263.2 | 7 |
|             | -75.25 | 39.75 | F  | 0.03 | 0.01 | 1999 | 2191.6 | 7 |
| -           | -75.75 | 39.25 | W  | 0.03 | 0.01 | 2000 | 2135.2 | 7 |
|             | -75.75 | 39.25 | Sp | 0.03 | 0.01 | 2000 | 2180.2 | 7 |
|             | -75.75 | 39.25 | Su | 0.03 | 0.01 | 2000 | 2264.4 | 7 |
|             | -75.75 | 39.25 | F  | 0.03 | 0.01 | 2000 | 2192.8 | 7 |
| Susquehann  | -76.25 | 39.25 | W  | 0.03 | 0.01 | 2000 | 2135.2 | 7 |
|             | -76.25 | 39.25 | Sp | 0.03 | 0.01 | 2000 | 2180.2 | 7 |
|             | -76.25 | 39.25 | Su | 0.03 | 0.01 | 2000 | 2264.4 | 7 |
|             | -76.25 | 39.25 | F  | 0.03 | 0.01 | 2000 | 2192.8 | 7 |
| Potomac     | -76.75 | 38.75 | W  | 0.03 | 0.01 | 2000 | 2133.3 | 7 |
|             | -76.75 | 38.75 | Sp | 0.03 | 0.01 | 2000 | 2184.4 | 7 |
|             | -76.75 | 38.75 | Su | 0.03 | 0.01 | 2000 | 2272   | 7 |
|             | -76.75 | 38.75 | F  | 0.03 | 0.01 | 2000 | 2197.3 | 7 |
| -           | -76.75 | 37.75 | W  | 0.03 | 0.01 | 2002 | 2167.2 | 7 |
|             | -76.75 | 37.75 | Sp | 0.03 | 0.01 | 2002 | 2207.7 | 7 |
|             | -76.75 | 37.75 | Su | 0.03 | 0.01 | 2002 | 2291.2 | 7 |
|             | -76.75 | 37.75 | F  | 0.03 | 0.01 | 2002 | 2222   | 7 |
| -           | -76.75 | 39.25 | W  | 0.03 | 0.01 | 2000 | 2135.2 | 7 |
|             | -76.75 | 39.25 | Sp | 0.03 | 0.01 | 2000 | 2180.2 | 7 |
|             | -76.75 | 39.25 | Su | 0.03 | 0.01 | 2000 | 2264.4 | 7 |
|             | -76.75 | 39.25 | F  | 0.03 | 0.01 | 2000 | 2192.8 | 7 |
| -           | -77.25 | 38.25 | W  | 0.03 | 0.01 | 2002 | 2135.5 | 7 |
|             | -77.25 | 38.25 | Sp | 0.03 | 0.01 | 2002 | 2186.7 | 7 |
|             | -77.25 | 38.25 | Su | 0.03 | 0.01 | 2002 | 2274.5 | 7 |
|             | -77.25 | 38.25 | F  | 0.03 | 0.01 | 2002 | 2199.6 | 7 |
| James River | -77.75 | 37.25 | W  | 0.03 | 0.01 | 2006 | 2158.3 | 7 |
|             | -77.75 | 37.25 | Sp | 0.03 | 0.01 | 2006 | 2194.3 | 7 |
|             | -77.75 | 37.25 | Su | 0.03 | 0.01 | 2006 | 2283.5 | 7 |
|             | -77.75 | 37.25 | F  | 0.03 | 0.01 | 2006 | 2214.7 | 7 |
| SAB         |        |       |    |      |      |      |        |   |
| -           | -78.25 | 34.25 | W  | 0.03 | 0.01 | 2018 | 2312.8 | 7 |
|             | -78.25 | 34.25 | Sp | 0.03 | 0.01 | 2018 | 2343.5 | 7 |
|             | -78.25 | 34.25 | Su | 0.03 | 0.01 | 2018 | 2381.8 | 7 |
|             | -78.25 | 34.25 | F  | 0.03 | 0.01 | 2018 | 2346.8 | 7 |
| -           | -79.25 | 33.25 | W  | 0.03 | 0.01 | 2024 | 2277.7 | 7 |

|                  |        |       |    |      |      |      |        |   |
|------------------|--------|-------|----|------|------|------|--------|---|
|                  | -79.25 | 33.25 | Sp | 0.03 | 0.01 | 2024 | 2320.7 | 7 |
|                  | -79.25 | 33.25 | Su | 0.03 | 0.01 | 2024 | 2377.1 | 7 |
|                  | -79.25 | 33.25 | F  | 0.03 | 0.01 | 2024 | 2325.7 | 7 |
| <b>Pee Dee</b>   | -79.25 | 33.75 | W  | 0.03 | 0.01 | 2024 | 2277.7 | 7 |
|                  | -79.25 | 33.75 | Sp | 0.03 | 0.01 | 2024 | 2320.7 | 7 |
|                  | -79.25 | 33.75 | Su | 0.03 | 0.01 | 2024 | 2377.1 | 7 |
|                  | -79.25 | 33.75 | F  | 0.03 | 0.01 | 2024 | 2325.7 | 7 |
| -                | -79.75 | 33.25 | W  | 0.03 | 0.01 | 2024 | 2277.7 | 7 |
|                  | -79.75 | 33.25 | Sp | 0.03 | 0.01 | 2024 | 2320.7 | 7 |
|                  | -79.75 | 33.25 | Su | 0.03 | 0.01 | 2024 | 2377.1 | 7 |
|                  | -79.75 | 33.25 | F  | 0.03 | 0.01 | 2024 | 2325.7 | 7 |
| -                | -80.25 | 32.75 | W  | 0.03 | 0.01 | 2029 | 2276.8 | 7 |
|                  | -80.25 | 32.75 | Sp | 0.03 | 0.01 | 2029 | 2321.8 | 7 |
|                  | -80.25 | 32.75 | Su | 0.03 | 0.01 | 2029 | 2384.1 | 7 |
|                  | -80.25 | 32.75 | F  | 0.03 | 0.01 | 2029 | 2315.4 | 7 |
| <b>Santee</b>    | -80.25 | 33.25 | W  | 0.03 | 0.01 | 2024 | 2277.7 | 7 |
|                  | -80.25 | 33.25 | Sp | 0.03 | 0.01 | 2024 | 2320.7 | 7 |
|                  | -80.25 | 33.25 | Su | 0.03 | 0.01 | 2024 | 2377.1 | 7 |
|                  | -80.25 | 33.25 | F  | 0.03 | 0.01 | 2024 | 2325.7 | 7 |
| <b>Roanoke</b>   | -80.75 | 32.25 | W  | 0.03 | 0.01 | 2029 | 2276.8 | 7 |
|                  | -80.75 | 32.25 | Sp | 0.03 | 0.01 | 2029 | 2321.8 | 7 |
|                  | -80.75 | 32.25 | Su | 0.03 | 0.01 | 2029 | 2384.1 | 7 |
|                  | -80.75 | 32.25 | F  | 0.03 | 0.01 | 2029 | 2315.4 | 7 |
| -                | -80.75 | 32.75 | W  | 0.03 | 0.01 | 2029 | 2276.8 | 7 |
|                  | -80.75 | 32.75 | Sp | 0.03 | 0.01 | 2029 | 2321.8 | 7 |
|                  | -80.75 | 32.75 | Su | 0.03 | 0.01 | 2029 | 2384.1 | 7 |
|                  | -80.75 | 32.75 | F  | 0.03 | 0.01 | 2029 | 2315.4 | 7 |
| -                | -81.25 | 31.75 | W  | 0.03 | 0.01 | 2035 | 2253.8 | 7 |
|                  | -81.25 | 31.75 | Sp | 0.03 | 0.01 | 2035 | 2327.5 | 7 |
|                  | -81.25 | 31.75 | Su | 0.03 | 0.01 | 2035 | 2402.1 | 7 |
|                  | -81.25 | 31.75 | F  | 0.03 | 0.01 | 2035 | 2305.6 | 7 |
| <b>Savannah</b>  | -81.25 | 32.25 | W  | 0.03 | 0.01 | 2029 | 2276.8 | 7 |
|                  | -81.25 | 32.25 | Sp | 0.03 | 0.01 | 2029 | 2321.8 | 7 |
|                  | -81.25 | 32.25 | Su | 0.03 | 0.01 | 2029 | 2384.1 | 7 |
|                  | -81.25 | 32.25 | F  | 0.03 | 0.01 | 2029 | 2315.4 | 7 |
| -                | -81.75 | 30.75 | W  | 0.03 | 0.01 | 2035 | 2328.1 | 7 |
|                  | -81.75 | 30.75 | Sp | 0.03 | 0.01 | 2035 | 2364   | 7 |
|                  | -81.75 | 30.75 | Su | 0.03 | 0.01 | 2035 | 2408.3 | 7 |
|                  | -81.75 | 30.75 | F  | 0.03 | 0.01 | 2035 | 2369.4 | 7 |
| -                | -81.75 | 31.25 | W  | 0.03 | 0.01 | 2035 | 2253.8 | 7 |
|                  | -81.75 | 31.25 | Sp | 0.03 | 0.01 | 2035 | 2327.5 | 7 |
|                  | -81.75 | 31.25 | Su | 0.03 | 0.01 | 2035 | 2402.1 | 7 |
|                  | -81.75 | 31.25 | F  | 0.03 | 0.01 | 2035 | 2305.6 | 7 |
| <b>Althamaha</b> | -81.75 | 31.75 | W  | 0.03 | 0.01 | 2035 | 2253.8 | 7 |
|                  | -81.75 | 31.75 | Sp | 0.03 | 0.01 | 2035 | 2327.5 | 7 |
|                  | -81.75 | 31.75 | Su | 0.03 | 0.01 | 2035 | 2402.1 | 7 |
|                  | -81.75 | 31.75 | F  | 0.03 | 0.01 | 2035 | 2305.6 | 7 |
